# Supplementary material
Source: publisher site journal article supplement (https://www.dovepress.com/article/393457)
Supplement: Supplementary file 1 [file get_supplementary_file.php]

**Table S1: Types of first-line treatment and second-line treatment**

| **Therapy** | **First-line（n=269）** | **Second-line（n=135）** |
| --- | --- | --- |
| TKI | 235 (87.4) | 41 (30.3) |
| ICIs+TKI | 27 (10.0) | 78 (57.8) |
| mTOR | 7 (2.6) | 14 (10.4) |
| ICIs+mTOR | 0 (0) | 1 (0.7) |
| ICIs | 0 (0) | 1 (0.7) |

Abbreviations: TKI, Tyrosine kinase inhibitors; ICIs, Immune checkpoint inhibitors; mTOR, mammalian target of rapamycin

**Table S2. Baseline characteristics of patients in ccRCC or non-ccRCC groups, according to in MDT group or not.**

| **Characteristics** | **ccRCC** | | **P value** | **non-ccRCC** | | **P value** |
| --- | --- | --- | --- | --- | --- | --- |
| MDT group | non-MDT group | MDT group | non-MDT group |
| (N=90) | (N=106) | **(**N=39) | **(**N=34) |
| **Age, median (IQR)** | 57.00 (50.75, 66.00) | 59.00 (50.00, 68.25) | 0.785 | 38.00 (48.00, 54.00) | 30.75 (46.50, 55.25) | 0.79 |
| < 50, No. (%) | 21 (23.3%) | 23 (21.7%) |  | 23 (59.0%) | 19 (55.9%) |  |
| ≥ 50, No. (%) | 69 (76.7%) | 83 (78.3%) |  | 16 (41.0%) | 15 (40.1%) |  |
| **Gender, No. (%)** |  |  | 0.112 |  |  | 0.964 |
| Female | 16 (17.8%) | 29 (27.4%) |  | 17 (43.6%) | 15 (44.1%) |  |
| Male | 74 (82.2%) | 77 (72.6%) |  | 22 (56.4%) | 19 (55.9%) |  |
| **cT stage, No. (%)** |  |  | 0.152 |  |  | 0.261 |
| 1-2 | 45 (50.0%) | 62 (58.5%) |  | 20 (51.3%) | 11 (32.4%) |  |
| 3-4 | 33 (36.7%) | 38 (35.8%) |  | 18 (46.2%) | 22 (64.7%) |  |
| NA | 12 (13.3%) | 6 (5.7%) |  | 1 (2.6%) | 1 (2.9%) |  |
| **ISUP, No. (%)** |  |  | 0.178 |  |  | 0.228 |
| 1-2 | 28 (31.1%) | 21 (19.8%) |  | 3 (7.7%) | 0 (0.0%) |  |
| 3-4 | 45 (50.0%) | 64 (60.4%) |  | 28 (71.8%) | 28 (82.4%) |  |
| NA | 17 (18.9%) | 21 (19.8%) |  | 8 (20.5%) | 6 (17.6%) |  |
| **Nephrectomy, No. (%)** |  |  | 0.869 |  |  | 0.007 |
| Yes | 78 (86.7%) | 91 (85.8%) |  | 38 (97.4%) | 26 (76.5%) |  |
| No | 12 (13.3%) | 15 (14.2%) |  | 1 (2.6%) | 8 (23.5%) |  |
| **IMDC, No. (%)** |  |  | 0.162 |  |  | 0.389 |
| Low risk (0) | 18 (20.0%) | 15 (14.2%) |  | 3 (7.7%) | 1 (2.9%) |  |
| Intermediate risk (1-2) | 63 (70.0%) | 71 (67.0%) |  | 29 (74.4%) | 23 (67.6%) |  |
| High risk (≥ 3) | 9 (10.0%) | 20 (18.9%) |  | 7 (17.9%) | 10 (29.4%) |  |
| **Interval from diagnosis to metastasis, No. (%)** |  |  | 0.472 |  |  | 0.171 |
| Metachronous | 37 (41.1%) | 49 (46.2%) |  | 15 (40.3%) | 8 (40.7%) |  |
| Synchronous | 53 (58.9%) | 57 (53.8%) |  | 24 (59.7%) | 26 (59.3%) |  |
| **Metastatic site, No. (%)** |  |  |  |  |  |  |
| Lung | 55 (61.1%) | 72 (67.9%) | 0.320 | 8 (20.5%) | 12 (35.3%) | 0.158 |
| Bone | 34 (37.8%) | 28 (26.4%) | 0.088 | 8 (20.5%) | 12 (35.3%) | 0.158 |
| Liver | 13 (14.4%) | 10 (9.4%) | 0.277 | 4 (10.3%) | 5 (14.7%) | 0.564 |
| Brain | 3 (3.3%) | 8 (7.5%) | 0.201 | 0 | 1 (2.9%) | 0.281 |
| Lymph node | 18 (20.0%) | 26 (24.5%) | 0.449 | 22 (56.4%) | 20 (58.8%) | 0.835 |
| Other | 34 (37.8%) | 32 (30.2%) | 0.263 | 18 (46.2%) | 14 (41.2%) | 0.669 |
| **Number of metastatic organs, No. (%)** |  |  | 0.551 |  |  | 0.758 |
| Single | 42 (46.7%) | 54 (50.9%) |  | 21 (53.8%) | 17 (50.0%) |  |
| Multiple (≥2 sites) | 48 (53.3%) | 52 (49.1%) |  | 18 (46.2%) | 17 (50.0%) |  |
| **Metastasis resection, No. (%)** |  |  | 0.096 |  |  | 0.315 |
| Yes | 10 (11.1%) | 21 (19.8%) |  | 8 (14.7%) | 4 (17.9%) |  |
| No | 80 (88.9%) | 85 (80.2%) |  | 31 (85.3%) | 30 (82.1%) |  |
| **Multi-line therapy, No. (%)** |  |  | 0.011 |  |  | 0.016 |
| Yes | 52 (57.8%) | 42 (39.6%) |  | 27 (69.2%) | 14 (41.2%) |  |
| No | 38 (42.2%) | 64 (60.4%) |  | 12 (30.9%) | 20 (58.8%) |  |

Abbreviations: MDT, Multidisciplinary team; ccRCC, Clear cell renal cell carcinoma; ISUP, international society of urological pathology; IMDC, International Metastatic renal cell carcinoma Database Consortium.

**Table S3: Univariable and multivariable analysis for OS in patients diagnosed with ccRCC (N = 196) and non-ccRCC (N = 73)**

| **Factors** | **ccRCC** | | | | **non-ccRCC** | | | |
| --- | --- | --- | --- | --- | --- | --- | --- | --- |
| **Univariable** | | **Multivariable** | | **Univariable** | | **Multivariable** | |
| **HR (95%CI)** | **P value** | **HR (95%CI)** | **P value** | **HR (95%CI)** | **P value** | **HR (95%CI)** | **P value** |
| **Age, y** |  | 0.631 |  | - |  | 0.898 | - | - |
| ≥ 50 vs. < 50 | 1.129 (0.689,1.849) |  | - |  | 0.955 (0.473,1.929) |  |  |  |
| **Gender** |  | 0.335 |  | - |  | 0.133 | - | - |
| Male vs. female | 0.799 (0.506,1.261) |  | - |  | 1.806 (0.835,3.908) |  |  |  |
| **IMDC** |  | < 0.001 |  | 0.081 |  | < 0.001 |  | 0.003 |
| Low | Ref. |  | Ref. |  | Ref. |  | Ref. |  |
| Intermediate | 1.053 (0.594,1.865) |  | 0.919 (0.475,1.779) | 0.803 | 11014.321 (0,1.422E+70) | 0.905 | 1672.273 (0,1.611E+62) | 0.915 |
| High | 2.890 (1.472,5.673) |  | 1.749 (0.785,3.898) | 0.172 | 53563.395 (0,6.922E+70) | 0.889 | 7878.521 (0,7.606E+62) | 0.897 |
| **cT stage** |  | 0.034 |  | 0.055 |  | 0.013 |  | 0.664 |
| 3-4 vs. 1-2 | 1.596 (1.036,2.458) |  | 1.590 (0.990,2.556) |  | 2.637 (1.229,5.659) |  | 1.226 (0.489,3.071) |  |
| **ISUP** |  | 0.59 |  | - |  | 0.3 | - | - |
| 3-4 vs. 1-2 | 1.150 (0.691,1.914) |  | - |  | 24.461 (0.058,10322.718) |  | - |  |
| **Interval from diagnosis to metastasis** |  | 0.215 |  | - |  | 0.167 |  | - |
| Metachronous vs. Synchronous | 0.773 (0.515,1.162) |  | - |  | 0.573 (0.260,1.262) |  | - |  |
| **Number of metastatic organs** |  | 0.001 |  | 0.001 |  | 0.16 |  | - |
| ≥ 2 vs. 1 sites | 2.099 (1.381,3.189) |  | 2.181 (1.383,3.438) |  | 1.652 (0.820,3.326) |  | - |  |
| **Nephrectomy** |  | 0.006 |  | 0.441 |  | < 0.001 |  | 0.910 |
| Yes vs. no | 0.467 (0.271,1.803) |  | 0.772 (0.401,1.489) |  | 0.206 (0.086,0.494) |  | 0.939 (0.313,2.814) |  |
| **Metastasis resection** |  | 0.815 |  | - |  | 0.801 |  | - |
| Yes vs. no | 1.065 (0.629,1.803) |  | - |  | 1.121 (0.461,2.726) |  | - |  |
| **MDT** |  | < 0.001 |  | 0.023 |  | 0.004 |  | 0.032 |
| Yes vs. no | 0.428 (0.271,0.675) |  | 0.576 (0.359,0.926) |  | 0.337 (0.162,0.703) |  | 0.404 (0.176,0.927) |  |
| **Multi-line therapy** |  | 0.001 |  | < 0.001 |  | 0.009 |  | 0.026 |
| Yes vs. no | 0.489 (0.323,0.739) |  | 0.417 (0.261,0.666) |  | 0.390 (0.193,0.789) |  | 0.394 (0.174,0.893) |  |

Abbreviations: ccRCC, Clear cell renal cell carcinoma; IMDC, International Metastatic renal cell carcinoma Database Consortium; ISUP, international society of urological pathology; MDT, Multidisciplinary team.


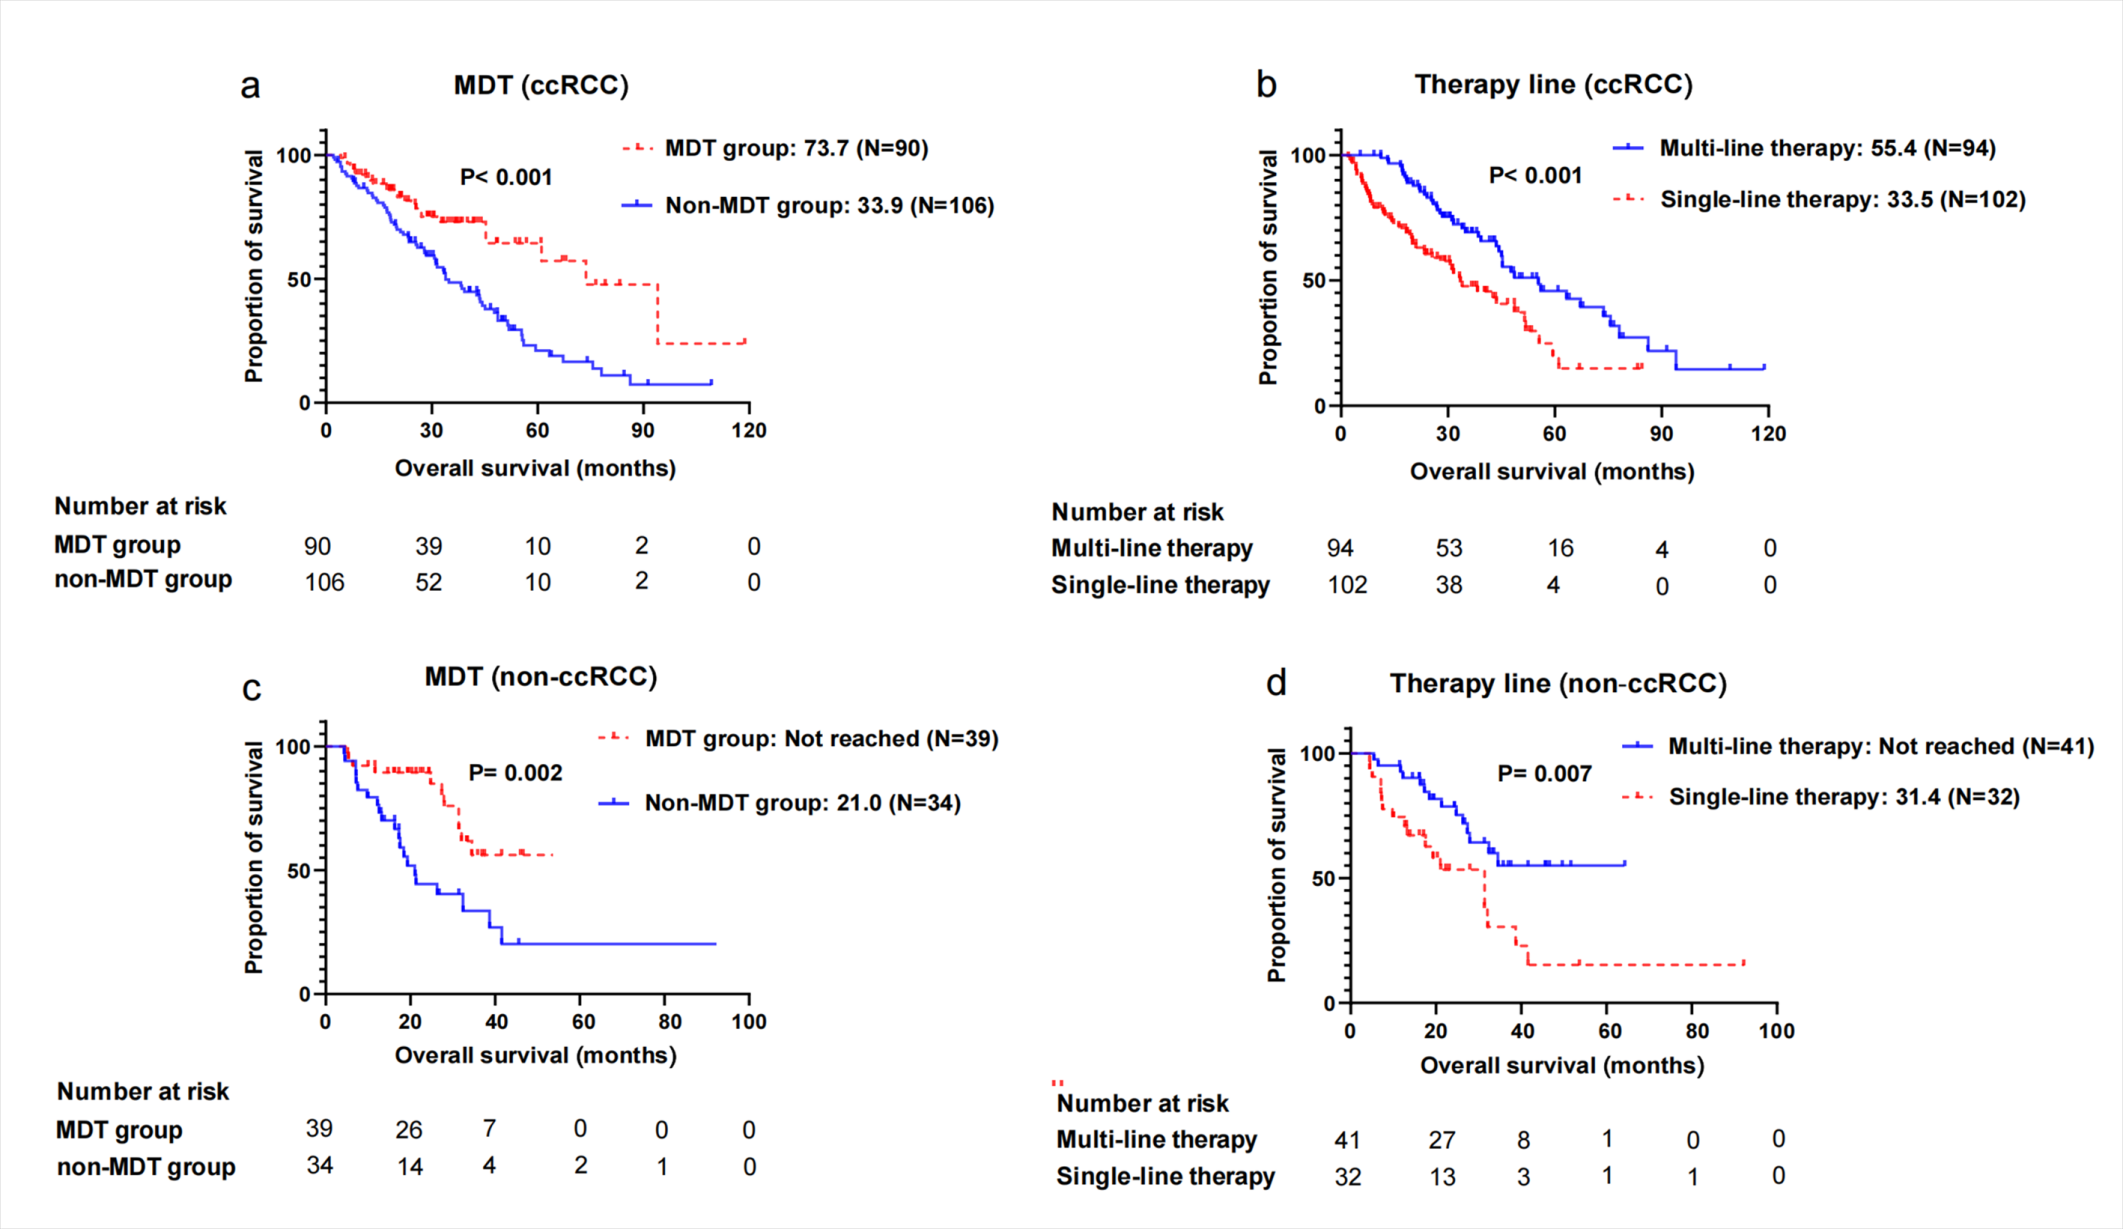


**Fig.S1 Kaplan-Meier curves of OS for patients with or without MDT, and with or without multi-line therapy among ccRCC and non-ccRCC**

MDT management as a favorable indicator for OS in patients with ccRCC (a) or nonccRCC (c); OS of ccRCC (b) and non-ccRCC (d) in patients who received multi-line therapy or single-line therapy


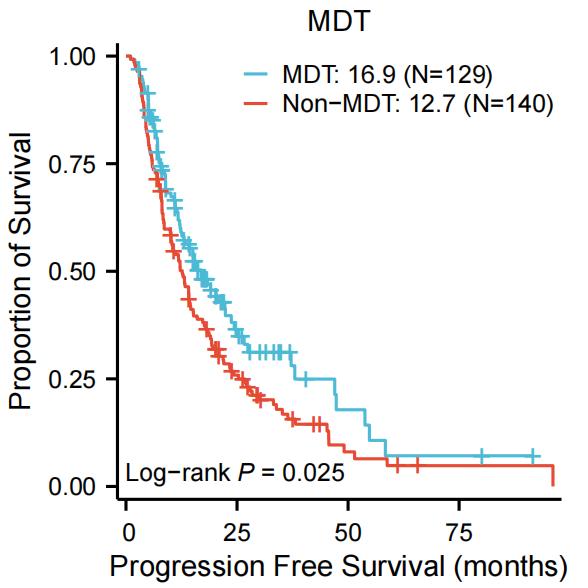


**Fig.S2 Kaplan-Meier curves of PFS for patients**

MDT management as a favorable indicator for PFS in all patients (n = 269);

**Table S4. Univariable and multivariable analyses for PFS.**

| **Factors** | **Univariable** | | | **Multivariable** | |
| --- | --- | --- | --- | --- | --- |
| **HR (95%CI)** | **P value** | **HR (95%CI)** | | **P value** |
| **Age, y** |  | 0.818 |  | |  |
| ≥ 50 vs. < 50 | 0.965 (0.710, 1.310) |  |  | |  |
| **Gender** |  | 0.475 |  | |  |
| Male vs. female | 0.889 (0.645 - 1.227) |  |  | |  |
| **IMDC** |  |  |  | |  |
| Low | Ref. |  | Ref. | |  |
| Intermediate | 0.323 (0.190, 0.548) | **< 0.001** | 0.383 (0.200, 0.733) | | **0.004** |
| High | 0.492 (0.346, 0.700) | **< 0.001** | 0.592 (0.402, 0.871) | | **0.008** |
| **Histological type** |  | 0.279 |  | |  |
| ccRCC vs. non-ccRCC | 1.194 (0.866, 1.648) |  |  | |  |
| **cT stage** |  | **0.023** | 1.210 (0.882, 1.660) | | 0.238 |
| 3-4 vs. 1-2 | 1.408 (1.047, 1.892) |  |  | |  |
| **ISUP** |  | 0.066 |  | |  |
| 3-4 vs. 1-2 | 1.434 (0.976 - 2.105) |  |  | |  |
| **Interval from diagnosis to metastasis** |  | **0.049** |  | | 0.847 |
| Metachronous vs. synchronous | 0.747 (0.559, 0.998) |  | 0.967 (0.685, 1.364) | |  |
| **Number of metastatic organs** |  | **< 0.001** |  | | **0.007** |
| ≥ 2 vs. 1 sites | 1.780 (1.337, 2.371) |  | 1.520 (1.119, 2.064) | |  |
| **Nephrectomy** |  | **0.004** |  | | 0.741 |
| Yes vs. no | 1.778 (1.199 - 2.636) |  | 1.082 (0.678, 1.727) | |  |
| **Metastasis Resection** |  | 0.537 |  | |  |
| Yes vs. no | 1.126 (0.773 - 1.639) |  |  | |  |
| **MDT** |  | **0.026** |  | | 0.143 |
| Yes vs. no | 0.722 (0.542, 0.962) |  | 1.253 (0.927, 1.694) | |  |
| **Multi-line therapy** |  | 0.070 |  | |  |
| Yes vs. no | 0.769 (0.578, 1.022) |  |  | |  |

Abbreviations: IMDC, International Metastatic renal cell carcinoma Database Consortium; ccRCC, Clear cell renal cell carcinoma; ISUP, international society of urological pathology; MDT, Multidisciplinary team.
